# Supplementary material
Source: PubMed Central journal article supplement (PMC9540981)
Supplement: NIHMS1838207-supplement-Supplementary_Material.pdf [file NIHMS1838207-supplement-Supplementary_Material.pdf]

Effect of Omega-3 and -6 Supplementation on Language in Preterm Toddlers Exhibiting Autism Spectrum Disorder Symptoms; Journal of Autism and Developmental Disorders; Kelly W. Sheppard, Kelly M. Boone, Barbara Gracious, Mark A. Klebanoff, Lynette K. Rogers, Joseph Rausch, Christopher Bartlett, Daniel L. Coury, Sarah A. Keim; The Research Institute at Nationwide Children's Hospital and the Department of Pediatrics, Ohio State University, [kelly.sheppard@nationwidechildrens.org](mailto:kelly.sheppard@nationwidechildrens.org)

### Supplementary Tables and Figures

Supplementary Figure 1. Omega-6 and omega-3 fatty acid metabolic pathway. n-6: Omega-6; n-3: Omega-3; FADS: Fatty acid desaturase; ELOVL: Elongation of very long chain polyunsaturated fatty acids.

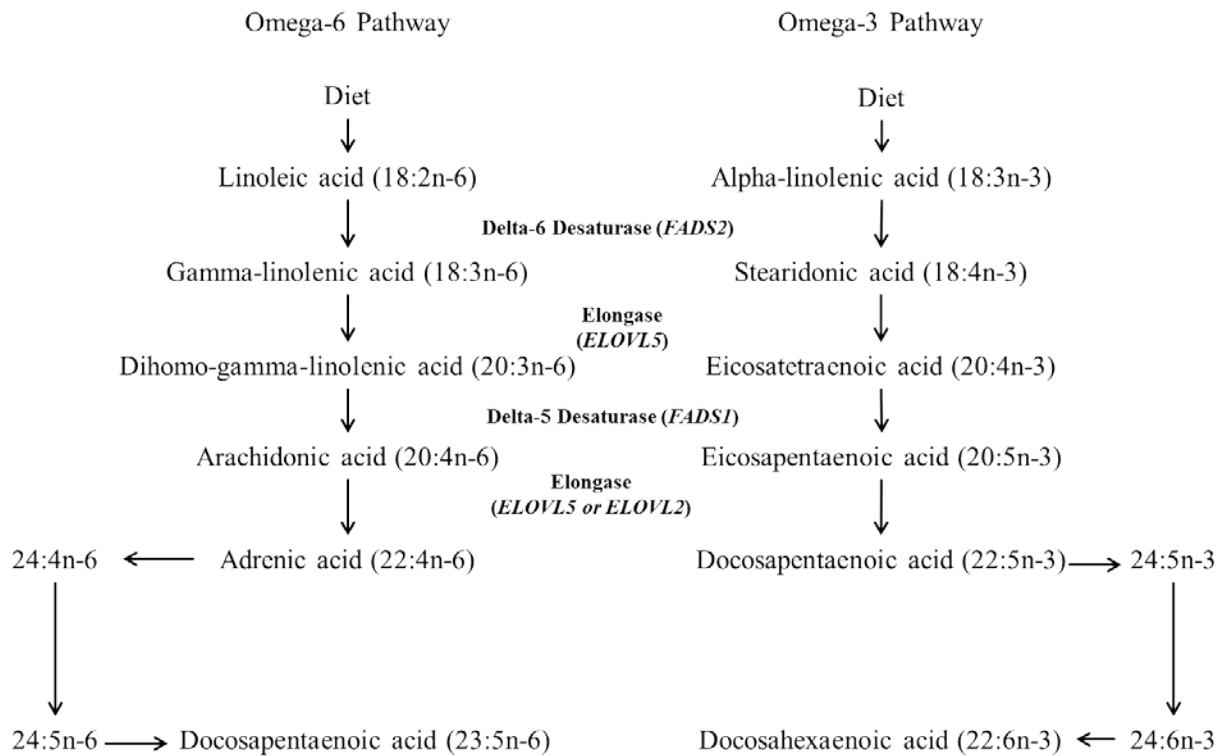

Supplementary Table 1. Words and gestures from the CDI forms included in the present study.

| <b>Gestures (12 total)</b>                                                      | <b>Words (100 total)</b> |         |            |          |           |
|---------------------------------------------------------------------------------|--------------------------|---------|------------|----------|-----------|
| Extend arm to show you something he/she is holding*                             | After                    | Could   | Hi         | No       | Star      |
| Blow kisses from a distance                                                     | Bedroom                  | Cracker | Horse      | Ouch     | Swing     |
| Smack lips in yum yum gesture to indicate that something tastes good            | Would                    | Day     | Hot        | Our      | Taste     |
| Shrug to indicate all gone or “where’d it go”                                   | Bench                    | All     | Hug        | Oven     | Thank you |
| Reach out and gives you a toy or some object that he/she is holding*            | Beside                   | Dog     | If         | Party    | Then      |
| Point (with arm and index finger extended) at some interesting object or event* | Bird                     | Down    | Applesauce | Peas     | Think     |
| Wave bye-bye on his/her own when someone leaves                                 | Boat                     | Duck    | Juice      | Person   | This      |
| Extend his/her arm upward to signal a wish to be picked up*                     | Book                     | Dump    | Last       | Ball     | Tiny      |
| Shake head no                                                                   | Broom                    | Ear     | Leg        | Plate    | Tonight   |
| Nod head yes                                                                    | Bye                      | Fast    | Like       | Pretend  | Bed       |
| Gesture hush by placing finger to lips                                          | Candy                    | Finish  | Listen     | Rain     | Towel     |
| Request something by extending arm and opening and closing hand*                | Car                      | Fit     | Meat       | Rip      | Trash     |
|                                                                                 | Airplane                 | Flag    | Meow       | School   | Tray      |
|                                                                                 | Carry                    | Friend  | Milk       | Shake    | Uh oh     |
|                                                                                 | Cat                      | All     | Mommy      | Shoe     | Under     |
|                                                                                 |                          | gone    |            |          |           |
|                                                                                 | Chase                    | Game    | Mop        | Shopping | Us        |
|                                                                                 | Chin                     | Gentle  | Baa Baa    | Sky      | Wet       |
|                                                                                 | Coke                     | Hand    | Much       | Sock     | Where     |
|                                                                                 | Cold                     | Happy   | Necklace   | Bear     | Wish      |
|                                                                                 | Comb                     | Hat     | Need       | Stairs   | Woof      |
|                                                                                 |                          |         |            |          | Woof      |

\*Deictic gestures. CDI: MacArthur-Bates Communicative Development Inventory.
